# Supplementary material
Source: MDPI journal article supplement (https://www.mdpi.com/2073-4433/13/8/1175)
Supplement: s1 [file s1]

# Emissions from a Modern Euro 6D Diesel Plug-In Hybrid

Tommaso Selleri\*, Anastasios D. Melas, Christian Ferrarese, Jacopo Franzetti, Carsten Gruening, Barouch Giechaskiel and Ricardo Suarez-Bertoa\*

## 1. Tables

**Table S1.** – On-road route details for selected examples: RDE-compliant route (RDE), mainly high-way driving (Motorway), or mainly city driving (City).

|                           | RDE  | Motorway | City  |
|---------------------------|------|----------|-------|
| Total trip duration (min) | 103  | 117      | 116   |
| Total trip distance (km)  | 91.1 | 187.7    | 129.2 |
| Average speed (km/h)      | 52.8 | 95.6     | 67.1  |
| Urban distance (km)       | 35.5 | 15.0     | 33.9  |
| Rural distance (km)       | 29.1 | 18.1     | 12.47 |
| Motorway distance (km)    | 26.5 | 154.6    | 82.9  |

**Table S2.** – List of performed experiments.

| Laboratory tests                                                                                                                                                                                                                                                                                                                                                                                         |
|----------------------------------------------------------------------------------------------------------------------------------------------------------------------------------------------------------------------------------------------------------------------------------------------------------------------------------------------------------------------------------------------------------|
| WLTP procedure                                                                                                                                                                                                                                                                                                                                                                                           |
| @23°C/-10°C (CD+CS)                                                                                                                                                                                                                                                                                                                                                                                      |
| WLTC test @ 40°C (CS)                                                                                                                                                                                                                                                                                                                                                                                    |
| BAB test @23°C/-10°C/40°C (CS)                                                                                                                                                                                                                                                                                                                                                                           |
| TfL test @23°C/-10°C/40°C (CS)                                                                                                                                                                                                                                                                                                                                                                           |
| simulated RDE @23°C/-10°C/40°C (CS)                                                                                                                                                                                                                                                                                                                                                                      |
| On-road tests                                                                                                                                                                                                                                                                                                                                                                                            |
| RDE route test (CD100/CD50/CD25/CS)                                                                                                                                                                                                                                                                                                                                                                      |
| Motorway route test (CS)                                                                                                                                                                                                                                                                                                                                                                                 |
| Urban route test (CS)                                                                                                                                                                                                                                                                                                                                                                                    |
| WLTP: Worldwide Harmonised Light-Duty Vehicles Test Procedure, CD: charge depleting, CS: charge sustaining, CDXX: charge depleting with initial SOC of high voltage battery equal to XX, * user selectable mode equal to electric; in all other cases is the default one. BAB: Bundesautobahn cycle, TfL: Traffic for London cycle, RDE: cycle compliant with real driving emission regulation 2017/1151 |

**Table S3.** – Tested vehicles.

| Fuel                    | Diesel               |
|-------------------------|----------------------|
| Traction                | ICE + Electric Motor |
| Injection               | DI                   |
| Emission control system | DOC, DPF, SCR, ASC   |
| Registration            | 2020                 |
| Mileage (km)            | 4494                 |

| Euro standard               |  |  | Euro 6d-ISC-FCM |  |  |
|-----------------------------|--|--|-----------------|--|--|
| ICE size (cm <sup>3</sup> ) |  |  | 1950            |  |  |
| Electric range (km)         |  |  | 82              |  |  |

ICE: internal combustion engine, DI: direct injection, DOC: Diesel oxidation catalyst, DPF: Diesel particulate filter, SCR: Selective catalytic reduction, ASC: Ammonia slip catalyst, ISC: in-service conformity, FCM: fuel consumption meter

  

| On-road tests |                                 |                                              |                           |                   |                              |                    |                   |                    |                                 |                           |
|---------------|---------------------------------|----------------------------------------------|---------------------------|-------------------|------------------------------|--------------------|-------------------|--------------------|---------------------------------|---------------------------|
| Route         | Condi-<br>tions @<br>test start | Aver-<br>age<br>T <sub>ambient</sub><br>(°C) | Mode of<br>opera-<br>tion | SOC<br>@<br>start | User se-<br>lectable<br>mode | NOx<br>(mg/k<br>m) | CO<br>(mg/k<br>m) | PN<br>(#/km)       | N <sub>2</sub> O<br>(mg/km<br>) | CO <sub>2</sub><br>(g/km) |
| RDE           | cold                            | 16                                           | CD                        | 100%              | Default                      | 24                 | 2                 | 3×10 <sup>9</sup>  | 2                               | 43                        |
| RDE           | cold                            | 13                                           | CD                        | 100%              | Default                      | 17                 | 0                 | 6×10 <sup>9</sup>  | 1                               | 45                        |
| RDE           | cold                            | 13                                           | CD                        | 100%              | Default                      | 29                 | 22                | 4×10 <sup>10</sup> | 2                               | 42                        |
| RDE           | cold                            | 17                                           | CD                        | 50%               | Default                      | 10                 | 0                 | 2×10 <sup>10</sup> | 3                               | 121                       |
| RDE           | hot                             | 15                                           | CD                        | 25%               | Default                      | 16                 | 0                 | 8×10 <sup>9</sup>  | 4                               | 155                       |
| RDE           | cold                            | 12                                           | CD                        | 25%               | Default                      | 19                 | 0                 | 3×10 <sup>10</sup> | n/a                             | 169                       |
| RDE           | hot                             | 14                                           | CS                        | min               | Default                      | 15                 | 0                 | 3×10 <sup>10</sup> | 12                              | 193                       |
| RDE           | hot                             | 15                                           | CS                        | min               | Default                      | 17                 | 3                 | 6×10 <sup>10</sup> | 6                               | 200                       |
| RDE           | cold                            | 9                                            | CS                        | min               | Default                      | 21                 | 6                 | 8×10 <sup>10</sup> | 5                               | 220                       |
| RDE           | cold                            | 14                                           | CS                        | min               | Default                      | 26                 | 0                 | 1×10 <sup>11</sup> | n/a                             | 214                       |
| motor-<br>way | hot                             | 15                                           | CS                        | min               | Default                      | 19                 | 0                 | 2×10 <sup>9</sup>  | n/a                             | 248                       |
| city          | cold                            | 18                                           | CS                        | min               | Default                      | 59                 | 19                | 3×10 <sup>10</sup> | n/a                             | 104                       |

RDE, motorway and city as defined in experimental section and Table S1, CD: charge depleting, CS: charge sustaining, SOC: state of charge of high voltage (HV) battery

Table S4. – Data summary.

| Test type     | NOx<br>(mg/km) | CO (mg/km) | HC + NOx<br>(mg/km) | SPN <sub>23</sub><br>(#/km) | N <sub>2</sub> O<br>(mg/km) | SPN <sub>10</sub><br>(#/km) |
|---------------|----------------|------------|---------------------|-----------------------------|-----------------------------|-----------------------------|
| Tests @ 23°C  |                |            |                     |                             |                             |                             |
| WLTC CD4      | 26             | 6          | 27                  | 3×10 <sup>11</sup>          | 5                           | 5×10 <sup>9</sup>           |
| WLTC CS       | 29             | 12         | 31                  | 3×10 <sup>9</sup>           | 9                           |                             |
| Weighted      | 4              | 1          | 4                   | 2×10 <sup>10</sup>          |                             |                             |
| BAB           | 66             | 0          | 66                  | 2×10 <sup>8</sup>           | 9                           |                             |
| TFL           | 66             | 0          | 66                  | 6×10 <sup>8</sup>           | 22                          |                             |
| Lab RDE       | 20             | 10         | 20                  | 6×10 <sup>8</sup>           | 14                          |                             |
| Tests @ -10°C |                |            |                     |                             |                             |                             |
| WLTC CD1      | 170            | 44         | 174                 | 4×10 <sup>11</sup>          | 4                           |                             |
| WLTC CS       | 379            | 22         | 383                 | 4×10 <sup>11</sup>          | 13                          | 8×10 <sup>11</sup>          |
| BAB           | 618            | 2          | 618                 | 1×10 <sup>11</sup>          | 7                           |                             |
| TFL           | 168            | 0          | 170                 | 6×10 <sup>11</sup>          | 29                          |                             |
| Lab RDE       | 154            | 69         | 157                 | 1×10 <sup>11</sup>          | 15                          |                             |
| Tests @ 5°C   |                |            |                     |                             |                             |                             |
| WLTC CS       | 37             | 0          | 38                  | 3×10 <sup>11</sup>          | 10                          |                             |
| BAB           | 97             | 1          | 97                  | 4×10 <sup>11</sup>          | 10                          |                             |
| TFL           | 68             | 0          | 69                  | 8×10 <sup>11</sup>          | 26                          |                             |
| Lab RDE       | 34             | 9          | 35                  | 1×10 <sup>11</sup>          | 12                          |                             |
| Tests @ 40°C  |                |            |                     |                             |                             |                             |
| WLTC CS       | 36             | 0          | 37                  | 2×10 <sup>9</sup>           | 10                          | 3×10 <sup>9</sup>           |
| BAB           | 131            | 0          | 131                 | 2×10 <sup>10</sup>          | 9                           |                             |
| TFL           | 85             | 0          | 86                  | 5×10 <sup>10</sup>          | 25                          |                             |
| Lab RDE       | 25             | 0          | 25                  | 1×10 <sup>10</sup>          | 12                          |                             |

Lab RDE as defined in experimental section and Table S1, CD: charge depleting, CS: charge sustaining.

## 2. Figures

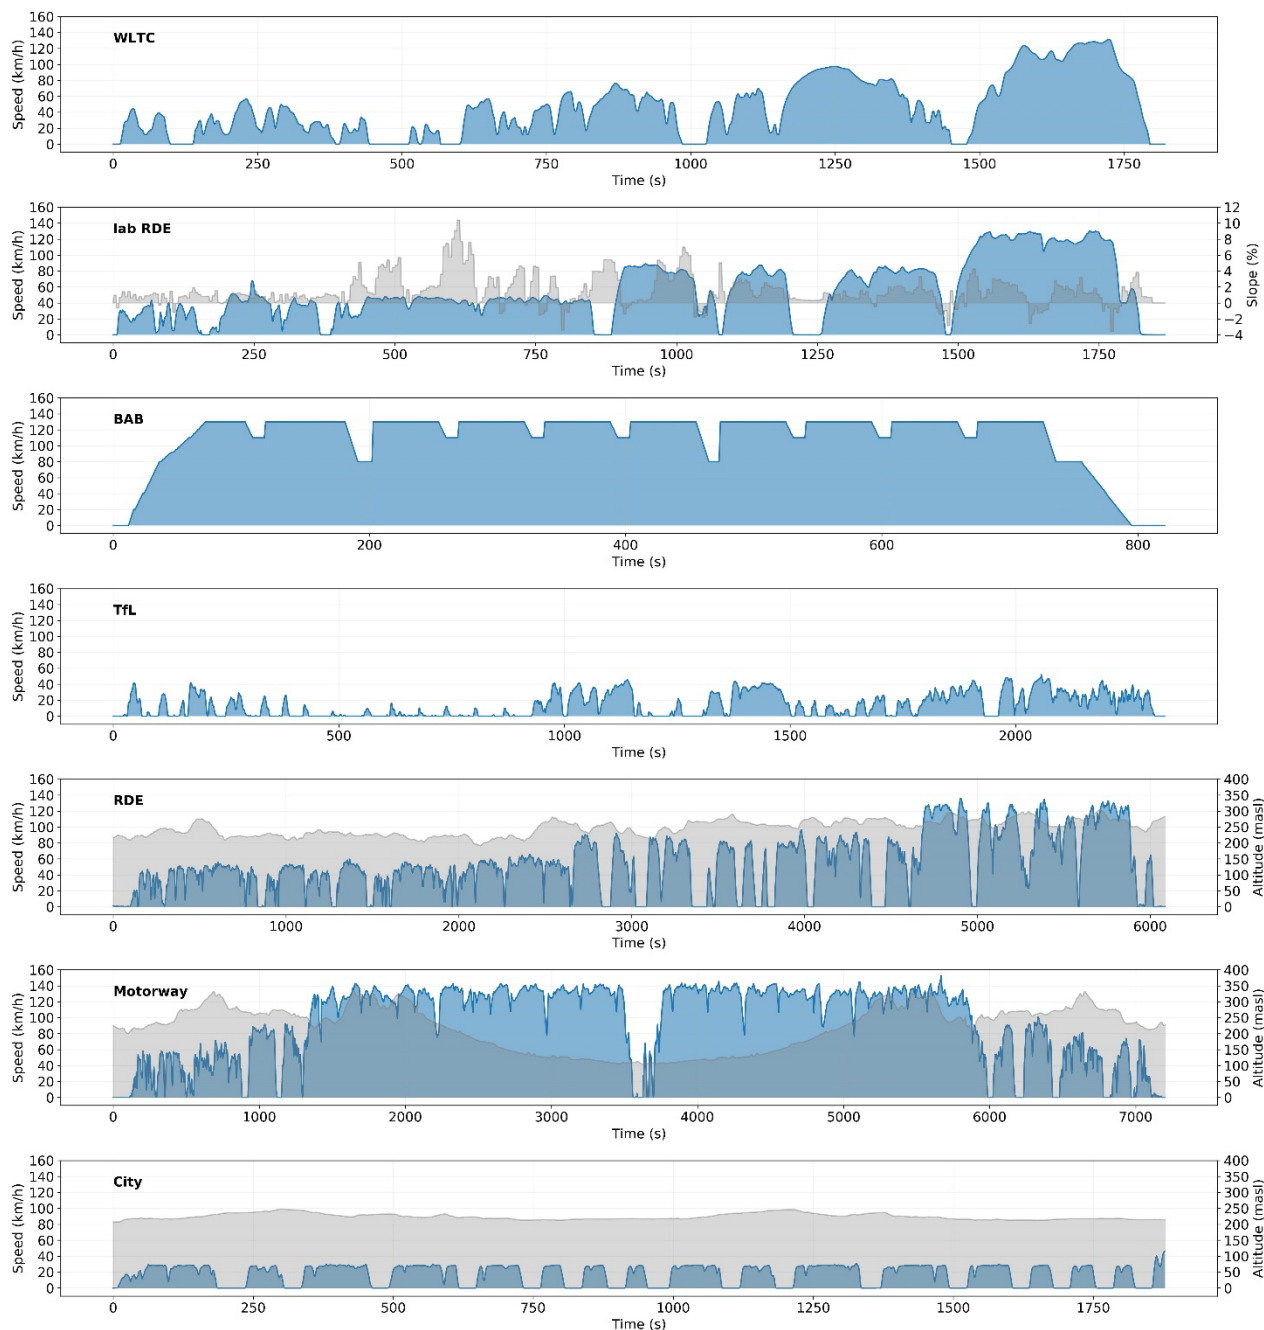

**Figure S1.** – Profiles of speed and slope (when relevant) for laboratory cycles. Examples of speed and altitude profiles for on-road routes.

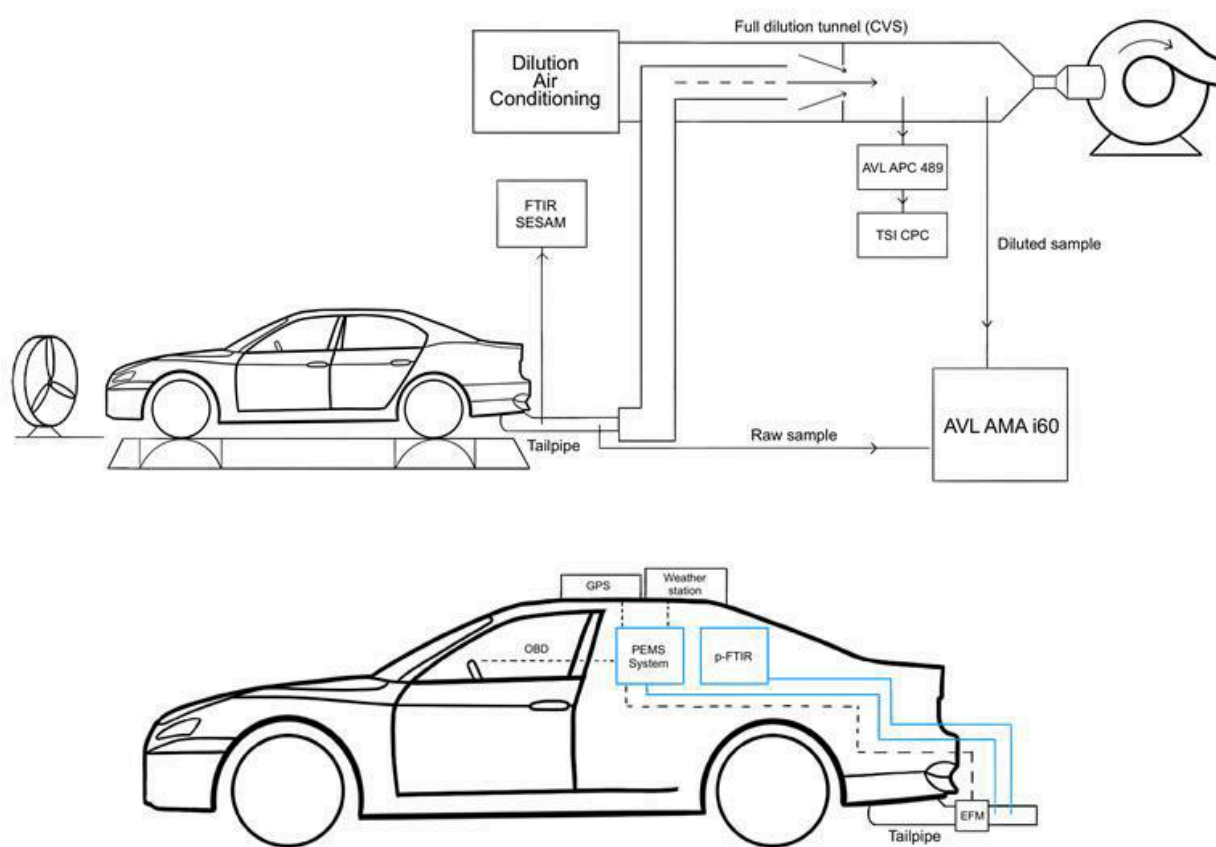

**Figure S2.** – Experimental set-up used during the tests performed at VELA 8 laboratory (top) and on-road (bottom).

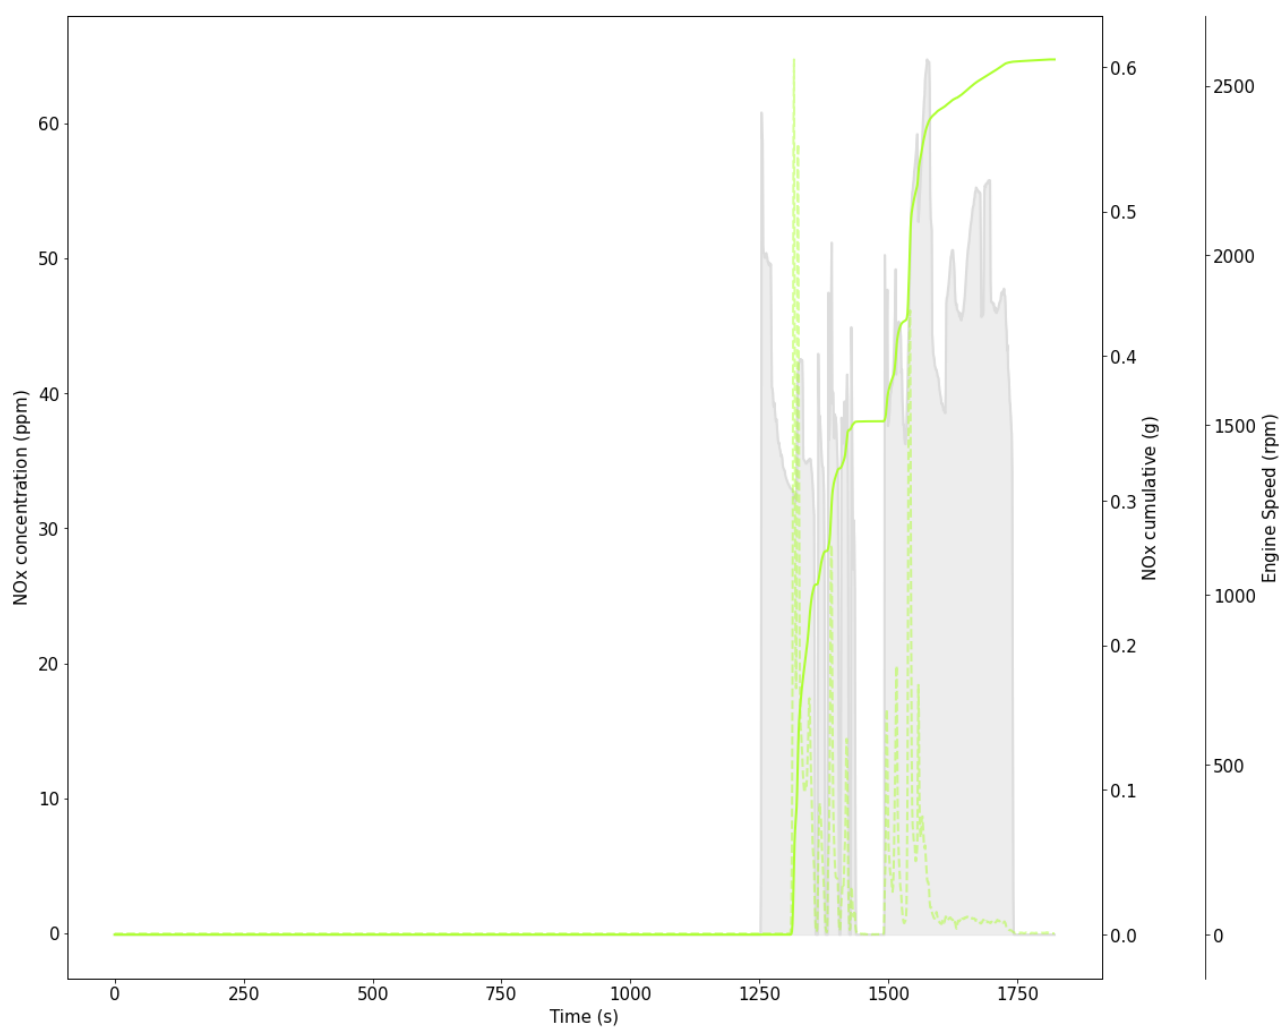

**Figure S3.** – Emissions of NOx during CD4 of the WLTP.

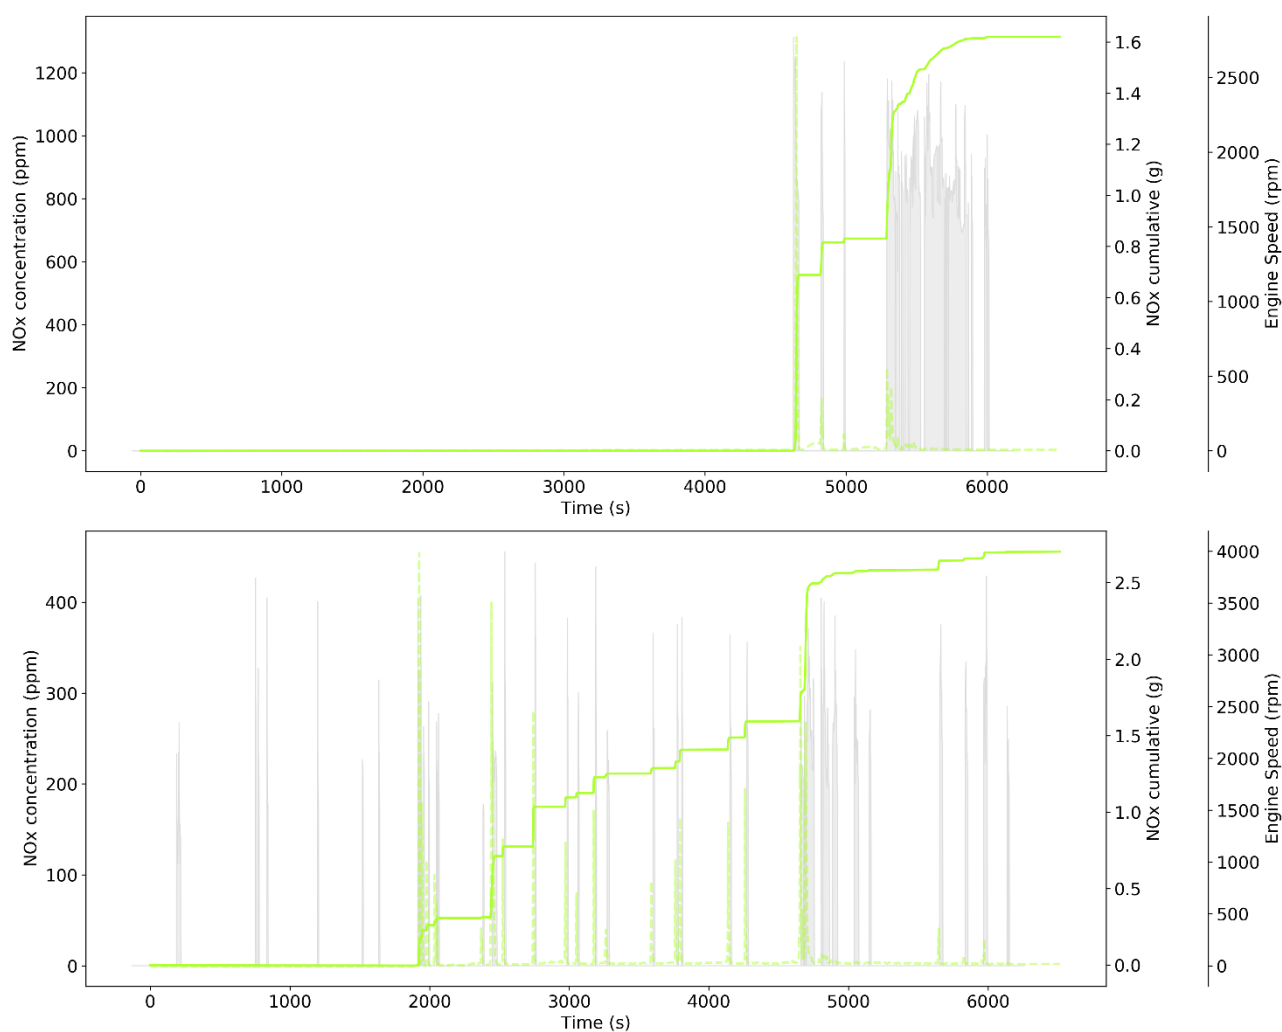

**Figure S4.** – Emissions of NO<sub>x</sub> during two RDE test with initial SOC equals to 100.

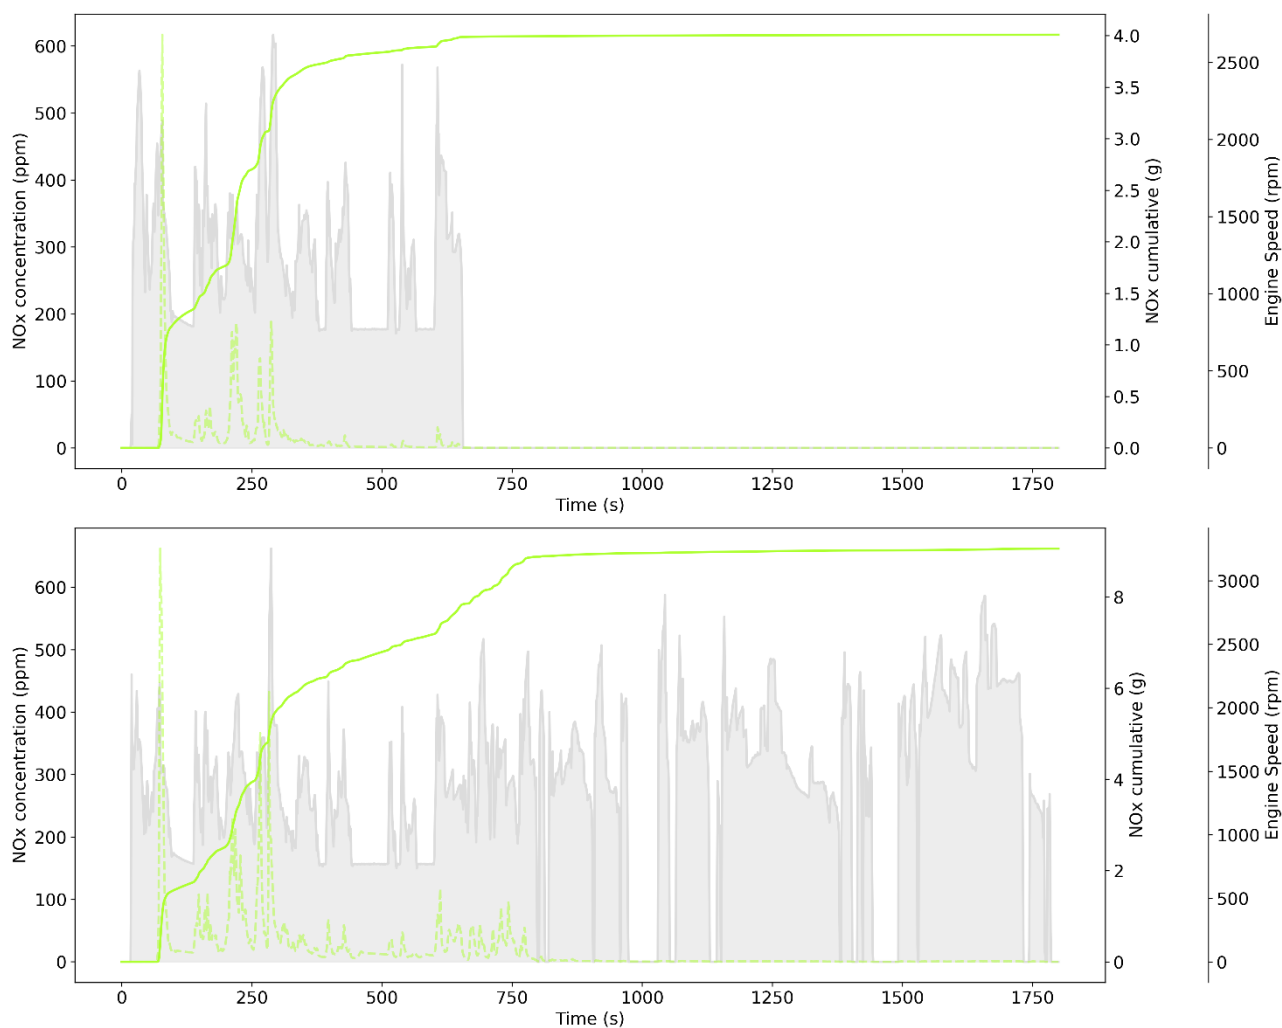

**Figure S5.** – Emissions of NO<sub>x</sub> during CD (top) and CS (bottom) of the WLTP at -10°C.

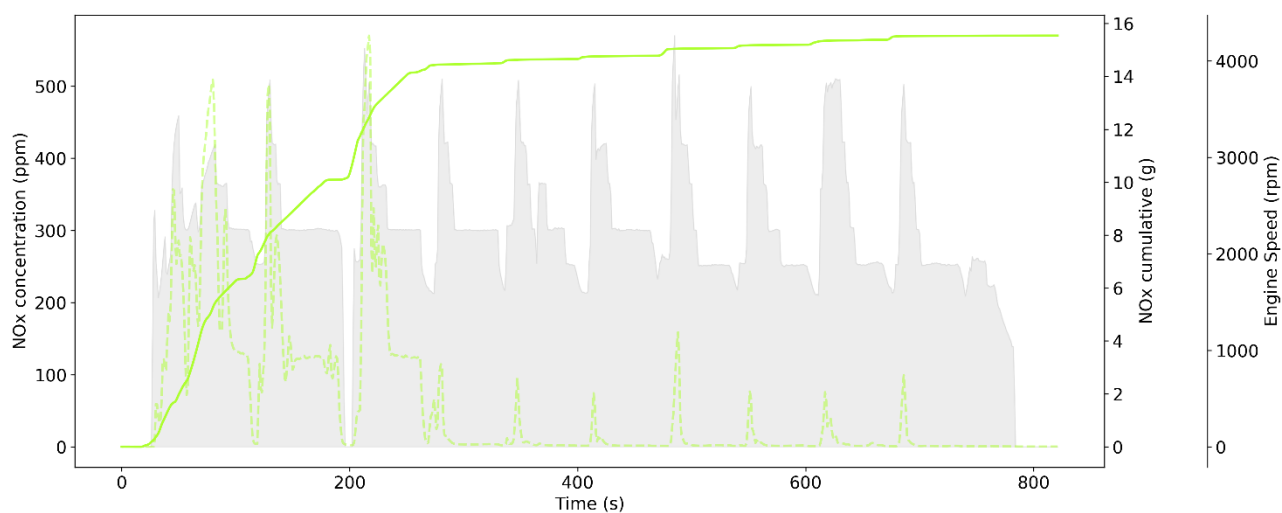

**Figure S6.** – Emissions of NO<sub>x</sub> during BAB test at -10°C.

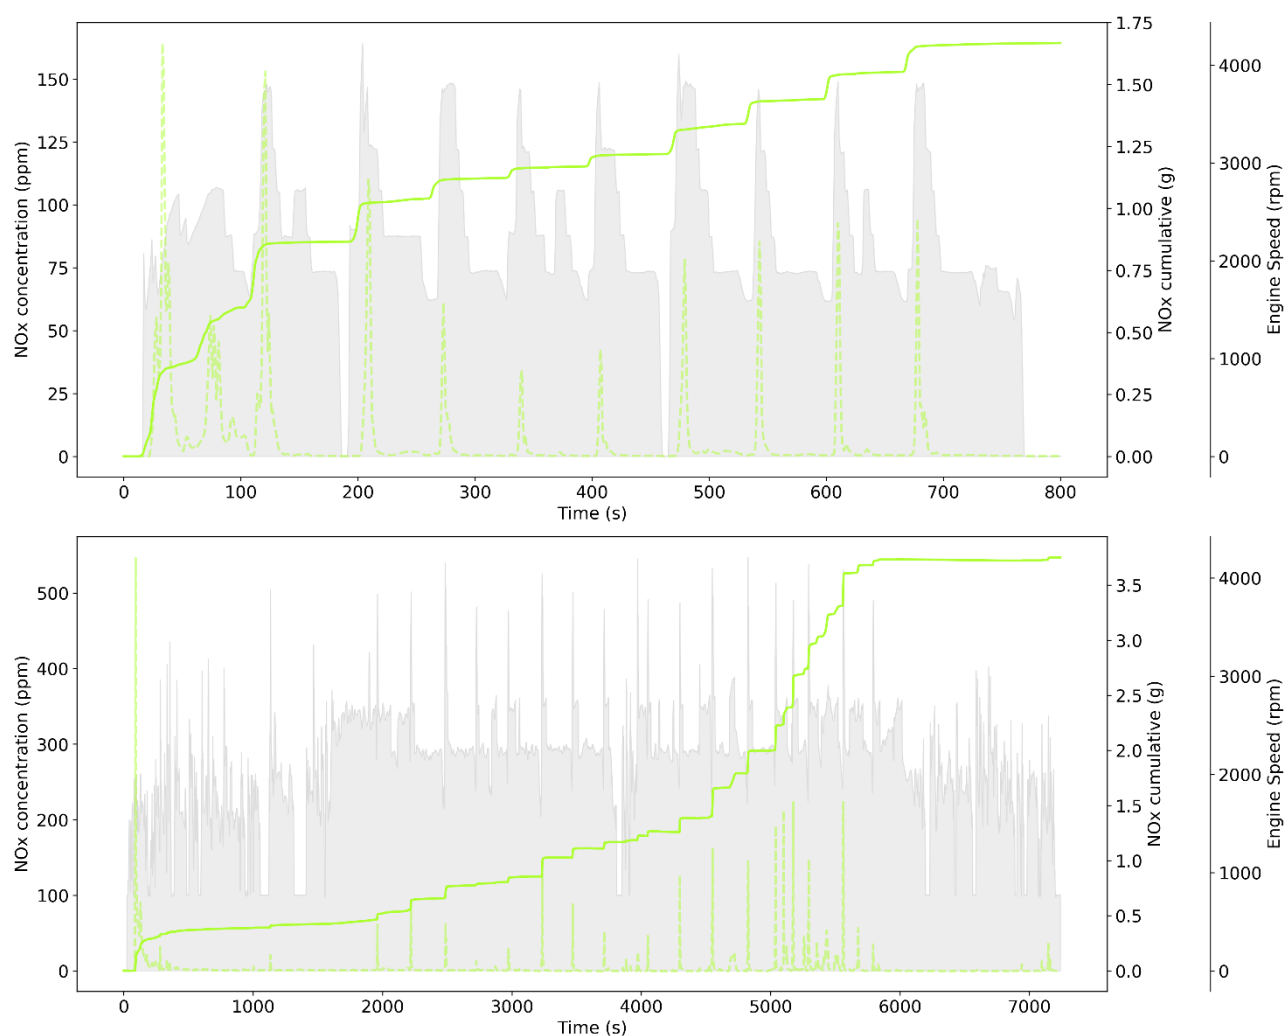

**Figure S7.** – Emissions of NO<sub>x</sub> during highway tests (Motorway route (bottom) and BAB (top)).
